# Supplementary material
Source: publisher figshare collection journal article supplement (https://tandf.figshare.com/ndownloader/files/16376243)
Supplement: Supplementary file 1 [file 16376243]

## Sheet: Sheet1
Supplementary Table 1
Patient Demographics
No. of Patients		338	%
Age
	Mean	68.32
	Std	11.11
Gender
	Male	260	76.9
	Female	78	23.1
Smoking Hx
	Never	62	18.3
	Former	172	50.9
	Current	102	30.2
	Unknown	2	0.6
Histology
	Papillary Transitional Cell	155	46
	Squamous Cell	7	2.1
	Transitional Cell	175	51.9
Grade
	Grade I	21	6.5
	Grade II	46	14.2
	Grade III	202	62.5
	Grade IV	54	16.7
H-score
	Low (< Q1)	84	24.8
	Intermediate (Q1-Q3)	170	50.1
	High (> Q3)	85	25.1
